# Supplementary material
Source: publisher site journal article supplement (https://www.dovepress.com/get_supplementary_file.php?f=339090.docx)
Supplement: Supplementary file 1 [file get_supplementary_file.php]

**Table S1. List of Institutional Review Boards and Independent Ethics Committees – TRANSFORM-1 and TRANSFORM -2**

**TRANSFORM-1**

**BELGIUM**

Ethisch comité OLV, Ziekenhuis, Aalst

UZ Brussel IRB, Brussels

Comité d'éthique hospitalo-facultaire, Liège

AZ St.-Jan Brugge, Bruges

Sint-Franciskusziekenhuis IRB, Heusden-Zolder

Jessa Ziekenhuis ethische toetsingscommissie, Hasselt

ULB Hôpital Erasme IRB, Brussels

AZ Maria Middelares IRB, Gent

AZ Sint-Lucas IRB, Bruges

Comité d'Éthique UCL Saint-Luc, Brussels

Comite d Ethique Cliniques Universitaires de Mont Godinne, Yvoir

**BRAZIL**

Comitê de Ética em Pesquisa do Investiga - Instituto de Pesquisas, Itapira

National Committee of Ethics in Research (CONEP), Brasilia

Comitê de ética em Pesquisa - Instituto de Pesquisas da Universidade Federal do Rio de Janeiro

Comite de Etica em Pesquisa da UNIFESP/EPM, São Paulo

Comite de Etica em Pesquisa do Hospital Universitario Walter Cantidio, Fortaleza

Comite de Etica em Pesquisa do Hospital Universitario Sao Jose, Belo Horizonte

Comite de Etica em Pesquisa do Instiruto de Neurologia, Curitiba

Comite de Etica em Pesquisa em Seres Humanos da Universidade, Passo Fundo

Comite de Etica em Pesquisa do Hospital das Clinicas da Faculdade de Medicina, Ribeirão Preto

Comite de Etica em Pesquisa da Associacao Educadora Sao Carlos, Porto Alegre

Comite de Etica em Pesquisas do Hospital Pro-Cardiaco, Rio de Janeiro

Comitê de Ética em Pesquisa da Faculdade de Medicina da UFPel, Pelotas

Comitê de Ética em Pesquisa da Faculdade de Medicina de Jundiaí (CEP-FMJ), São Paulo

CEP Pontificia Universidade Catolica de Campinas, São Paulo

Comite de Etica em Pesquisa da UFMG – COEP, Belo Horizonte

Comite de Etica em Pesquisa em Seres Humanos Hospital Universitário Pedro Ernesto, Rio de Janeiro

Comitê de Ética em Pesquisa do Hospital São José, Turvo

**CANADA**

Royal Ottawa Health Care Group, Ottawa, Ontario

UBC Clinical Research Ethics Board (CREB), Vancouver

Queen's University, Health Sciences and Affiliated Hospitals Research Ethics Board, Kingston, Ontario

CAMH Research Ethics Board, Toronto, Ontario

Comite d'ethique de la recherche institut universitaire en sante mentale Douglas, Montreal, Quebec

Hamilton Integrated Research Ethics Board, Hamilton, Ontario

CONJOINT Health Research Ethics Board, Calgary, Alberta

**ESTONIA**

Tallinn Medical Research Ethics Committee, Tallinn

**FRANCE**

CPP EST-IV, 1 Place de l'Hôpital, Strasbourg

**HUNGARY**

Central Ethics Committee Medical Research Council Ethics Committee for Clinical Pharmacology, Budapest

**MEXICO**

Comité de Etica en Investigación del Mexico Centre for Clinical Research, Mexico City, Durango

Comité de Etica en Investigación Centro Hospitalario, Guadalajara

Comité de Etica en Investigación del Instituto Jaliscience de Investigación Clínica, Guadalajara, Guanajuato

Comité de ética en Investigación de Winsett Rethman, Monterrey

Comité de Etica en Investigación del Hospital La Mision SA de CV, Monterrey

Comité de la Clínica Bajío, Monterrey

Comité de ética en Investigación del Hospital Aranda de la Parra, Leon

Comité de Ética en Investigación Hospital Ignacio Morones Prieto, San Luis Potosi

Comité de Etica en Investigación del Hospital General de Culiacán, Mazatlan

Comité de Ética en Investigación de la Facultad de Medicina y Hospital Universitario de la Univers, Monterrey

Comité de Etica en Investigación Axis Clinical Latina, Gustavo A. Madero

**SLOVAKIA**

Eticka komisia Bratislavskeho samospravneho kraja, Bratislava

Nezavisla eticka komisia, Banska Bystrica

Eticka komisia Psychiatrickej nemocnice, Michalovce

Eticka komisia Nemocnice s poliklinikou sv. Barbory, Roznava

Eticka komisia Presovskeho samospravneho kraja, Presov

Eticka komisia Liptovskej nemocnice s poliklinikou, Liptovsky Mikulas

**UNITED STATES**

Committee for the Protection of Human Subjects in Research, UMass Medical (Worcester, MA)

Creighton University Institutional Review Board (Omaha, NE)

Dean Institutional Review Board (Middleton, WI)

Duke University Health System Institutional Review Board (Durham, NC)

KU Human Subjects Committee (Wichita, KS)

Loyola University Chicago Health Services, IRB Division (Maywood, FL)

NYU State School of Medicine Institutional Review Board (New York, NY)

Office of Regulatory Affairs, University of Pennsylvania (Philadelphia, PA)

Quorum Review Board (Seattle, WA)

Rush University Medical Center Institutional Review Board (Chicago, IL)

Sharp HealthCare IRB (San Diego, CA)

Sterling Institutional Review Board (Atlanta, GA)

University of California San Diego Human Research Protections Program (La Jolla, CA)

Univeristy of North Carolina Biomedical Institutional Review Board (Chapel Hill, NC)

UT Southwestern Medical Center Institutional Review Board (Dallas, TX)

Western Institutional Review Board (Puyallup, WA)

**TRANSFORM-2**

**CZECH REPUBLIC**

Eticka komise pro multicentricke klinicke hodnoceni Fakultni nemocnice, Prague

**GERMANY**

Landesamt für Gesundheit und Soziales Berlin Geschäftsstelle der Ethik-Kommission des Landes Berlin

Ethik-Kommission bei der Landesärztekammer Rheinland-Pfalz, Mainz

Ethik-Kommission der Ärztekammer Nordrhein, Düsseldorf

Ethik-Kommission der Medizinischen Fakultät der Martin-Luther-Universität, Halle (Saale)

Ethikkommission bei der Bayerischen, Munich

Ethik-Kommission an der Medizinischen Fakultät der Eberhard-Karls-Universität und am Universitätsk, Tübingen

Ethikkommission der Sächsischen, Dresden

**POLAND**

Komisja Bioetyczna przy OIL w Warszawie, Warsaw

**SPAIN**

CEIC Parc de Salut Mar, Barcelona

**UNITED STATES**

Office of Regulatory Affairs, University of Pennsylvania (Philadelphia, PA)

Sterling Institutional Review Board (Atlanta, GA)

UT Southwestern Medical Center Institutional Review Board (Dallas, TX)

Western Institutional Review Board (Puyallup, WA)
